# Supplementary material for: Short-Chain Fatty Acids Impair Neutrophil Antiviral Function in an Age-Dependent Manner
Source: MDPI journal article supplement (doi:10.3390/cells11162515), 2022-08-13
Supplement: s1 [file s1]

(a)

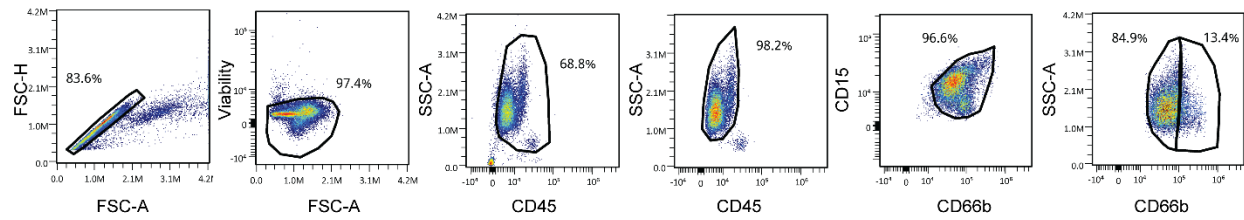

(b)

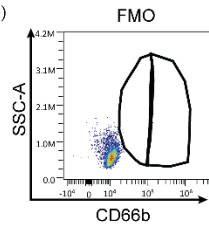

**Figure S1.** Gating strategy and viability of neutrophils after treatment with SCFAs. (a) Representative gating strategy to identify neutrophils after stimulation with SCFAs. Neutrophils were identified as CD45<sup>+</sup>, SSC-A<sup>high</sup>, CD15<sup>+</sup> CD66b<sup>+</sup> cells. (b) FMO for CD66b, gated on CD45<sup>+</sup>.

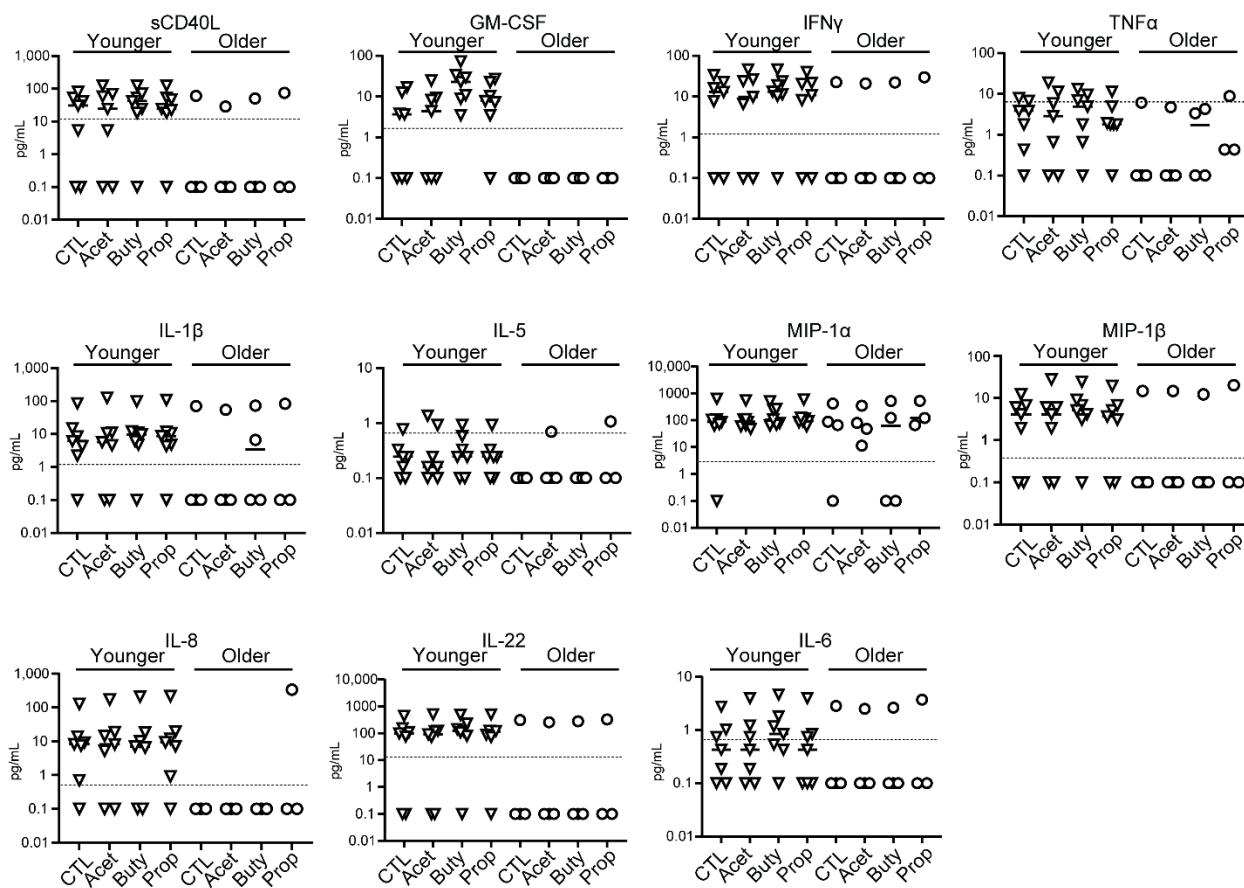

**Figure S2.** Cytokine and chemokine release by neutrophils after treatment with pathological concentrations of SCFAs. Neutrophils were incubated for 3 h in the presence or absence of SCFAs, and cell-free supernatants were used to quantify the concentration of cytokines and chemokines by Luminex. Each dot represents a different patient. Triangles: younger ( $n = 7$ ); Circles: older ( $n = 4$ ). Dotted line: limit of detection. CTL: control; Acet: acetate 25 mM; Buty: butyrate 25 mM; Prop: propionate 25 mM.

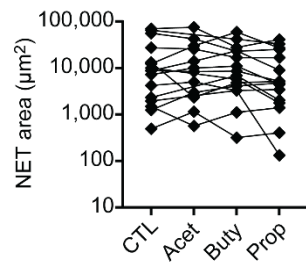

**Figure S3.** Pathological concentrations of SCFA did not change basal NET release by unstimulated neutrophils. Each dot represents a different patient ( $n = 17$ ; younger = 8; older = 9). Kruskal–Wallis with Dunn’s post-test was used to compare three or more groups. CTL: control; Acet: acetate 25 mM; Buty: butyrate 25 mM; Prop: propionate 25 mM.
